# Supplementary material for: Autonomous laboratories for accelerated materials discovery: a community survey and practical insights
Source: Royal Society of Chemistry journal article supplement (doi:10.1039/d4dd00059e), 2024-01-01
Supplement: d4dd00059e2.xlsx [file d4dd00059e2.xlsx]

## Sheet: All responses
	Q1	Q4	Q4_4_TEXT	Q5	Q7	Q42_1	Q42_2	Q44	Q45	Q46_1	Q46_2	Q46_3	Q13_1	Q13_2	Q13_3	Q13_4	Q13_5	Q13_6	Q13_7	Q13_7_TEXT	Q14_1	Q33	Q62	Q56	CategoryQ56	Q57	CategoryQ57	Q58	CategoryQ58	Q59_1	Q60	CategoryQ60	Q8	Q46	Q11	Q10	Q10_7_TEXT	Q12	Q47	Q65	Q17	Q17_11_TEXT	Q18	Q19	Q36	Q48	Q48_17_TEXT	Q51	Q51_17_TEXT
Response ID identifier	What most closely describes your role at work? - Selected Choice	What best describes your research work? - Selected Choice	What best describes your research work? - Other - Text	Which best describes your facility? - Selected Choice	Please check one or more:	Q42 - How many hours a week do you typically spend in the lab?	Q42 - How many hours a week do you typically spend working outside the lab?	What would be more helpful to you this month:	Which is a bigger factor in limiting your research progress this month:	Think about your typical laboratory time this month. Please estimate what the relative contributions of each category are to your lab work. - Set-up and clean-up:	Think about your typical laboratory time this month. Please estimate what the relative contributions of each category are to your lab work. - Troubleshooting:	Think about your typical laboratory time this month. Please estimate what the relative contributions of each category are to your lab work. - Performing research:	Which of the potential benefits would most motivate you to invest in automation? Please drag to rank order. - Day to day time savings/efficiency	Which of the potential benefits would most motivate you to invest in automation? Please drag to rank order. - Researcher happiness	Which of the potential benefits would most motivate you to invest in automation? Please drag to rank order. - Researcher safety	Which of the potential benefits would most motivate you to invest in automation? Please drag to rank order. - Enablement of new processes	Which of the potential benefits would most motivate you to invest in automation? Please drag to rank order. - Reproducibility (e.g., from lab to lab)	Which of the potential benefits would most motivate you to invest in automation? Please drag to rank order. - Generation of larger datasets	Which of the potential benefits would most motivate you to invest in automation? Please drag to rank order. - Other	Which of the potential benefits would most motivate you to invest in automation? Please drag to rank order. - Other - Text	Flexibility refers to the ability to modify an automation workflow to test various different research hypotheses. Throughput refers to the ability of an automation workflow to test one hypothesis over many samples and iterations. Which is more important for your research?	When thinking about automation, what is more valuable to you?	Can you provide an example?	What is the rate-limiting or bottleneck step in your current workflow? For example, sample preparation for TEM or substrate preparation for electrochemistry.	[Assigned manually by TRI]	If you could only automate (or better automate) one step in your current workflow, is it the rate limiting step? If not, what would it be and why? For example, domain expertise is needed for quality control; data analysis.	[Assigned manually by TRI]	What is the primary bottleneck in your current research that cannot be automated? For example, generating scientific hypotheses; I don't think robots can match my quality	[Assigned manually by TRI]	How much more quickly could you complete your current research project if your workflow was automated?	What would you NOT want automated? Why? For example, I enjoy cleaning glassware!	[Assigned manually by TRI]	To what extent do you think increasing automation in your current workflow will change the nature of your work?	To what extent do you think increasing automation in the field’s experimental workflows will change the nature of your work?	What is your general outlook about the future use of automation in your research or field?	What are some reasons why you may have negative feelings? Please check all that apply. - Selected Choice	What are some reasons why you may have negative feelings? Please check all that apply. - Other - Text	How do you think automation is likely to change job satisfaction and general happiness in your day-to-day work?	In this section we ask for more details about your experimental workflow and or the procedures you use during lab work. Think about all of the laboratory work you do, from set up to data synthesis. You can also provide general feedback at the end of this section. Are you willing to answer additional questions? (estimated additional 10 mins)	Is your research work primarily computational/theoretical?	Which safety concerns are you exposed to over the course of a typical month Check all that apply: - Selected Choice	Which safety concerns are you exposed to over the course of a typical month Check all that apply: - Other - Text	To what extent do safety concerns bottleneck your research progress?	If the safety element (e.g., human exposure to a toxin) was able to be isolated and fully automated, how much of a positive effect would it have on your ability to advance your research activities?	How difficult would it be to change the existing space to enable increased automation?	Which of the following categories fall into your regular (monthly basis) workflow? Please choose all that apply. - Selected Choice	Which of the following categories fall into your regular (monthly basis) workflow? Please choose all that apply. - Other - Text	Which categories take up the most of your time? Please choose up to three. - Selected Choice	Which categories take up the most of your time? Please choose up to three. - Other - Text
1	Postdoctoral researcher	Mostly computational/theoretical		University or academic research institution	I don’t have much experience with automation in the lab								6	5	1	3	2	4	7		2	To get rid of dull, dirty, or dangerous lab tasks.	In metallurgy, the mirror polish technique. Automatization permits produce samples of the same quality and in a short amount of time than made manually for humans. In addition, the contact of humans and the chemicals used by the technique are reduced.											A lot	Neutral	There are tasks I really enjoy doing that I don’t want taken over by an automated process,Other	Interpretation of data and exploring new techniques.	Somewhat increase	Yes	Yes
2	PI	Other	Entirely computational and theoretical	University or academic research institution	I am not currently interested in using automation in the lab								2	5	6	3	4	1	7		1	To get rid of dull, dirty, or dangerous lab tasks.												A lot	Positive	I have no negative feelings		Somewhat increase	Yes	Yes
3	Other	Mostly computational/theoretical		Private sector	I'm really interested in the possibilities generated using automation in the lab								4	2	1	3	5	6	7		2	To do things that are completely impossible for a human to currently do (e.g., imagine you had four arms).												A little	Neutral	It would be technically challenging to implement and maintain effective automated processes,Automation lessens the ability for scientific insight and/or research creativity		Somewhat increase	Yes	Yes
4	Postdoctoral researcher	Mostly experimental		University or academic research institution	I don’t have much experience with automation in the lab	20	30	Automating one of your data analysis steps	Time spent on set-up tasks, clean-up tasks, or troubleshooting	30	30	40	2	1	4	5	3	6	7		1	To get rid of dull, dirty, or dangerous lab tasks.		Preparing electrolytes	Sample prep	Yes	yes	Sample preparation for electrochemical measurement, where a lot of precision goes into it and is very sample-dependent	Sample prep	3	Preparation of samples for electrochemical measurement, because there small variations in many factors can result in incorrect measurement	On-the-fly	A little		Somewhat negative	It would be technically challenging to implement and maintain effective automated processes,I wouldn’t trust an automated process to do the job effectively,Automation lessens the ability for scientific insight and/or research creativity		Somewhat increase	Yes	No	Reactive,Flammable,Physical: sharps		Not at all	Neither increase nor decrease	A lot of effort (e.g., major lab renovation or entirely new space needed)	General lab tasks (e.g., part of day-to-day work but not necessarily workflow),Research planning (e.g., literature review, methodology research, hypothesis development) ,Experimental planning and design (e.g., any preparatory steps, supplies and materials planning and acquisition) ,Experimental set-up (e.g., preparing solutions, setting up equipment, organizing fume hood),Materials synthesis (e.g…		Research planning (e.g., literature review, methodology research, hypothesis development) ,Experimental set-up (e.g., preparing solutions, setting up equipment, organizing fume hood),Data analysis, interpretation, and management (e.g., downloading raw data from instrumentation, cleaning and collating data, converting data from signal intensity into units that can be interpreted by the researcher,…
5	Non-PI scientist	Mostly computational/theoretical		Private sector	I'm really interested in the possibilities generated using automation in the lab,I don’t have much experience with automation in the lab								1	4	5	2	6	3	7		2	To get rid of dull, dirty, or dangerous lab tasks.	Overall time-savings for routine tasks.											A lot	Positive	It would be technically challenging to implement and maintain effective automated processes		Significantly increase	Yes	Yes
6	Non-PI scientist	Other		Private sector	I don’t have much experience with automation in the lab								1	2	5	4	3	6	7		2	To get rid of dull, dirty, or dangerous lab tasks.	Grinding material with mortar and pestle											Somewhat	Somewhat positive	There are tasks I really enjoy doing that I don’t want taken over by an automated process,It would be technically challenging to implement and maintain effective automated processes,Automation lessens the ability for scientific insight and/or research creativity,Other	It will bias toward people with certain skill sets and ways of thinking	Neither increase nor decrease	No (submit your responses and end the survey)
7	Other	Mostly experimental		University or academic research institution	I consider myself an expert in automation in the lab	30	30	Automating one of your lab tasks	Time spent on set-up tasks, clean-up tasks, or troubleshooting	20	60	20	1	4	5	3	2	6	7		1	To get rid of dull, dirty, or dangerous lab tasks.		performing many experiments on large sample sets	Other	Yes	yes	Instrumentation troubleshooting when things don't go right.	Experiment setup	5	troubleshooting and experimental design	Experiment design	Somewhat		Positive	I have no negative feelings		Significantly increase	No (submit your responses and end the survey)
8	PI	Mostly experimental		National or international government-funded laboratory	I don’t have much experience with automation in the lab	20	20	Automating one of your data analysis steps	Time spent on set-up tasks, clean-up tasks, or troubleshooting	30	30	40	2	1	4	6	5	3	7		2	To get rid of dull, dirty, or dangerous lab tasks.	If someone has to run the same experiment with only slight variations every research day for a year, it would seem like that kind of task would be nice to automate. Also, for data analysis, a lot of time is spent doing the same series of calculations and plotting steps. If we start collecting more data, then it will definitely not be possible to process everything separately with an excel sheet.	This question is very project specific. However, when talking to students/PDs the most common thing I hear is "I just took that data, but haven't had a chance to work it up yet". Because it takes so long to analyze data there is a large gap between 1) collecting the data, 2) analyzing the data, and 3) interpreting (e.g. understanding what the data means in terms of mechanism, etc.). This means th…	Data	Yes, I would be a fan of automating data analysis. I think that controls could be put in place to make sure that it was analyzed correctly.	yes	Troubleshooting definitely would be difficult to automate. Holistic data interpretation without a model from a previous data set. For example, if you wanted to understand what happened to a material after catalysis testing you would do a series of tests that would say how the structure, composition, etc. changed. By looking at all of the data you would create a mechanism for what happened during …	Data interpretation	3	I think that it would be important that anything setup in the lab for automation also had the ability to do one-off experiments. For example, if we automated our electrochemistry for a specific cell and someone wanted to try out a new reaction (that would require a different cell, but the same electrochemistry), if everything was hardwired together in a way that made it impossible to try that one…	Validation	A lot		Somewhat positive	It would be technically challenging to implement and maintain effective automated processes		Somewhat increase	Yes	No	Reactive,Corrosive,Flammable,Toxicity,Carcinogen,Physical: sharps,Physical: heavy items		A lot	Neither increase nor decrease	Some effort (e.g., minor lab renovation)	General lab tasks (e.g., part of day-to-day work but not necessarily workflow),Research planning (e.g., literature review, methodology research, hypothesis development) ,Experimental planning and design (e.g., any preparatory steps, supplies and materials planning and acquisition) ,Experimental set-up (e.g., preparing solutions, setting up equipment, organizing fume hood),Materials synthesis (e.g…		Experimental set-up (e.g., preparing solutions, setting up equipment, organizing fume hood),Data analysis, interpretation, and management (e.g., downloading raw data from instrumentation, cleaning and collating data, converting data from signal intensity into units that can be interpreted by the researcher, running statistical analysis, analyzing spectra)
9	Postdoctoral researcher	Mix of computational/theoretical and experimental		University or academic research institution	I'm really interested in the possibilities generated using automation in the lab	10	40	Automating one of your lab tasks	Getting access to the equipment you need (e.g., bench space, instrument time)	50	30	20	2	1	6	5	4	3	7		2	To get rid of dull, dirty, or dangerous lab tasks.		Electrochemical cell cleaning and setting up new experiment	Experiment setup	Yes. Especially parallel measurements of 3-6 samples would be great.	yes	Catalyst film preparation	Sample prep	7	Data analysis I would not like to be completely automated but assisted by automation.	Data interpretation	A lot		Somewhat positive	It would be technically challenging to implement and maintain effective automated processes		Somewhat increase	No (submit your responses and end the survey)
10	PI	Mostly experimental		Private sector	I consider myself an expert in automation in the lab	0	40	Automating one of your data analysis steps	Time spent on set-up tasks, clean-up tasks, or troubleshooting	0	51	24	2	5	6	1	3	4	7		2	To do things that are completely impossible for a human to currently do (e.g., imagine you had four arms).	Collection and analysis of large amounts of data to determine root cause and correlation in a process which involves a large number of process steps	We are looking at manufacturing automation, so bottlenecks have to do with processes that require human intervention due to judgement, or processes that take a large amount of time due to the inability to safely determine when a process step is complete	Data	Data analysis	yes	The time it takes to develop enough confidence in the process data to render a high confidence judgement.	Data interpretation	5	Certain types of root cause analysis should still have human judgement and intervention	Data interpretation	A lot		Somewhat positive	Automation lessens the ability for scientific insight and/or research creativity		Significantly increase	No (submit your responses and end the survey)
11	Graduate student	Mostly experimental		University or academic research institution	I consider myself an expert in automation in the lab	40	10	Automating one of your data analysis steps	Time spent on set-up tasks, clean-up tasks, or troubleshooting	30	30	30	5	4	6	1	3	2	7		2	To do things that are completely impossible for a human to currently do (e.g., imagine you had four arms).		finding processing conditions for new materials to produce high quality samples	Synthesis	it is highly variable based on the materials used, and seemingly small changes can have large effects	no	identifying and synthesizing new materials	Synthesis	4	nothing	Nothing	Completely		Somewhat positive	It would be technically challenging to implement and maintain effective automated processes		Neither increase nor decrease	No (submit your responses and end the survey)
12	PI	Mostly computational/theoretical		University or academic research institution	I'm really interested in the possibilities generated using automation in the lab								4	5	6	1	3	2	7		1	To get rid of dull, dirty, or dangerous lab tasks.												A lot	Positive	It would be technically challenging to implement and maintain effective automated processes		Somewhat increase	No (submit your responses and end the survey)
13	Graduate student	Mix of computational/theoretical and experimental		University or academic research institution	I don’t have much experience with automation in the lab	5	36	Automating one of your data analysis steps	Time spent on set-up tasks, clean-up tasks, or troubleshooting	10	69	20	4	5	3	1	6	2	7		1	To get rid of dull, dirty, or dangerous lab tasks.	Repetitive tasks, particularly when it comes to building massive datasets.One human can't make 1000 electrolyte formulations, a robot can	Researcher time	Other	I would automate better the experimental part of the job: cycling a large number of cells and making sure they keep cycling, troubleshoot, start the new batch. However, that is not the RLS, but rather my time as a researcher	no	Reading literature, defining new research directions, establishing a new DOE	Objectives / hypotheses / design	2	Reading literature and formulating hypotheses, because this is how you learn from others and learn how they may think.	Objectives / hypotheses	Somewhat		Somewhat positive	It would be technically challenging to implement and maintain effective automated processes		Significantly increase	Yes	Yes
14	Non-PI scientist	Mostly computational/theoretical		Private sector	I'm really interested in the possibilities generated using automation in the lab,I don’t have much experience with automation in the lab								5	6	4	1	2	3	7		1	To do things that are completely impossible for a human to currently do (e.g., imagine you had four arms).												Somewhat	Somewhat positive	It would be technically challenging to implement and maintain effective automated processes		Neither increase nor decrease	Yes	Yes
15	PI	Mostly experimental		University or academic research institution	I'm really interested in the possibilities generated using automation in the lab	20	20	Automating one of your lab tasks	Time spent on set-up tasks, clean-up tasks, or troubleshooting	50	20	30	5	6	1	3	2	4	7		2	To get rid of dull, dirty, or dangerous lab tasks.		polymer synthesis and purification	Synthesis	the rate limiting step	yes	discovery of novel processing conepts	Synthesis	8	SEM of "early samples", where heterogeneity and rare results are highly informative	On-the-fly	Somewhat		Positive	I have no negative feelings		Somewhat increase	No (submit your responses and end the survey)
16	PI	Mix of computational/theoretical and experimental		University or academic research institution	I'm really interested in the possibilities generated using automation in the lab,I don’t have much experience with automation in the lab	10	34	Automating one of your data analysis steps	Getting access to the equipment you need (e.g., bench space, instrument time)	25	61	15	6	3	5	2	4	1	7		1	To do things that are completely impossible for a human to currently do (e.g., imagine you had four arms).	Mostly I am interested in traversing high dimensional input parameter spaces more effectively to yield large datasets that can be mined for novel scientific understanding	Human intensive data analysis and interpretation	Data	It will be necessary to automate the data analysis to achieve the scientific goal of quasi-real-time experimental updates and autonomation. But the ultimate goal requires both the data analysis (bottleneck) AND the hardware to be under computer control and automated.	yes	I think it can all be automated, in current workflows. It just takes investment of time and resources	Nothing	10	Interpretation and knowledge extraction of course, but I am not sure that it even makes sense to talk about automating that. An issue with automation is the black box nature of it and training new users. New generations of researchers will not gain critical skills unless we address this.	Data interpretation	A lot		Positive	It would be technically challenging to implement and maintain effective automated processes,Automation lessens the ability for scientific insight and/or research creativity		Somewhat increase	Yes	Yes
17	Graduate student	Mostly computational/theoretical		University or academic research institution	I'm really interested in the possibilities generated using automation in the lab								2	4	1	6	3	5	7		2	To get rid of dull, dirty, or dangerous lab tasks.												A lot	Positive	It would be technically challenging to implement and maintain effective automated processes		Somewhat increase	Yes	Yes
18	Graduate student	Mostly experimental		National or international government-funded laboratory	I'm really interested in the possibilities generated using automation in the lab	25	20	Automating one of your lab tasks	Time spent on set-up tasks, clean-up tasks, or troubleshooting	20	30	50	3	5	6	2	4	1	7		2	To get rid of dull, dirty, or dangerous lab tasks.	Pouch cell making is enormously time consuming but very routine, making it a perfect candidate for automation	Manufacturing of individual parts of pouch cells	Cell assembly	It is the rate limiting step	yes	Using the SEM	Other	6	Most of my data analysis is smaller-scale and changes from day to day, so it would not make sense to automate it (yet)	Cost not justified	Completely		Positive	I have no negative feelings		Significantly increase	No (submit your responses and end the survey)
19	Graduate student	Mostly computational/theoretical		University or academic research institution	I'm really interested in the possibilities generated using automation in the lab								1	6	5	2	3	4	7		3	To do things that are completely impossible for a human to currently do (e.g., imagine you had four arms).	Suppose we want to measure a battery's cycle over hundreds od cycles. A human can only set the experiment one by one. With a robot hand, we can set a region where the robot can scan and take one battery, put it in testing apparatus, and repeat until the testing apparatus is full. This can be extended to taking micrograph of a battery after testing as well, where the robot would deliver the specim…											A lot	Positive	It would be technically challenging to implement and maintain effective automated processes		Neither increase nor decrease	Yes	Yes
20	PI	Mostly experimental		University or academic research institution	I use automation (e.g., robotic arms or autosampler) that is already available in the lab	20	30	Automating one of your lab tasks	Time spent on set-up tasks, clean-up tasks, or troubleshooting	30	25	45	6	5	1	4	2	3	7		2	To do things that are completely impossible for a human to currently do (e.g., imagine you had four arms).		materials processing and data collection.	Sample prep	It would be processes that are prone to drift and irrproducibility.	no	trouble shooting operational problems in complex instruments for operation and reproducibility	Experiment setup	3	Additional qualitative information is gained by a human performing experiments--e.g. unanticipated observations such as a color change or glow.	On-the-fly	Somewhat		Somewhat positive	There are tasks I really enjoy doing that I don’t want taken over by an automated process,Automation lessens the ability for scientific insight and/or research creativity		Neither increase nor decrease	No (submit your responses and end the survey)
21	PI	Mostly experimental		University or academic research institution	I consider myself an expert in automation in the lab	15	25	Automating one of your data analysis steps	Time spent on set-up tasks, clean-up tasks, or troubleshooting	30	25	45	3	5	6	2	4	1	7		2	To do things that are completely impossible for a human to currently do (e.g., imagine you had four arms).	Performing a sequence of experiments with a throughput and reproducible conditions that exceed the capabilities of a standard human researcher	Detailed understanding of the crystal structure and microstructure of electrocatalysts	Measurement	Yes, characterizing structure and microstructure including sample preparation	yes	Responding to surprising data	Data interpretation	2	Selection of research objectives because I don't think automation can rival human abilities	Objectives / hypotheses	Somewhat		Positive	I have no negative feelings		Somewhat increase	Yes	No	Corrosive,Physical: sharps		Somewhat	Somewhat increase	Some effort (e.g., minor lab renovation)	General lab tasks (e.g., part of day-to-day work but not necessarily workflow),Research planning (e.g., literature review, methodology research, hypothesis development) ,Experimental planning and design (e.g., any preparatory steps, supplies and materials planning and acquisition) ,Experimental set-up (e.g., preparing solutions, setting up equipment, organizing fume hood),Materials synthesis (e.g…		Data analysis, interpretation, and management (e.g., downloading raw data from instrumentation, cleaning and collating data, converting data from signal intensity into units that can be interpreted by the researcher, running statistical analysis, analyzing spectra)
22	PI	Mostly computational/theoretical		Other	I don’t have much experience with automation in the lab								2	6	1	3	5	4	7		3	To do things that are completely impossible for a human to currently do (e.g., imagine you had four arms).												A lot	Positive	I have no negative feelings		Somewhat increase	Yes	Yes
23	PI	Mostly experimental		University or academic research institution	I consider myself an expert in automation in the lab	11	40	Automating one of your lab tasks	Getting access to the equipment you need (e.g., bench space, instrument time)	38	34	28	3	4	5	1	6	2	7		1	To do things that are completely impossible for a human to currently do (e.g., imagine you had four arms).	Instead of using testing as validation of designs expected to be high performance, use it to discover designs that are high performance.	Sample preparation	Sample prep	Yes - the iterative process of sample preparation/analysis.	yes	preparing stock reagents.	Experiment setup	10	Serendipity. More seriously, every experiment needs to be looked at by a human at least at a glance.	On-the-fly	Completely		Positive	I have no negative feelings		Significantly increase	Yes	No	My role presents no safety concerns					General lab tasks (e.g., part of day-to-day work but not necessarily workflow),Research planning (e.g., literature review, methodology research, hypothesis development) ,Experimental planning and design (e.g., any preparatory steps, supplies and materials planning and acquisition) ,Data management (e.g., downloading raw data from instrumentation, cleaning, collating data, etc.)		Research planning (e.g., literature review, methodology research, hypothesis development)
24	Graduate student	Mostly experimental		University or academic research institution	I'm really interested in the possibilities generated using automation in the lab	30	10	Automating one of your lab tasks	Getting access to the equipment you need (e.g., bench space, instrument time)	20	40	40	1	4	6	2	5	3	7		2	To get rid of dull, dirty, or dangerous lab tasks.	Starting an experiment, waiting for it to finish, then spending time changing out samples between measurements, starting the next experiment, and so on.	manual measurements, one by one, of thin film optical properties	Measurement	yes, the amount of time to set up and take each measurement	yes	developing new ideas for optical properties to measure	Objectives / hypotheses / design	8	I'd like to automate anything possible, it would leave more time for looking at the big picture and focusing on exploring new ideas	Nothing	Completely		Positive	I have no negative feelings		Significantly increase	Yes	No	Reactive,Corrosive,Flammable,Toxicity,Physical: sharps		A little	Somewhat increase	Some effort (e.g., minor lab renovation)	General lab tasks (e.g., part of day-to-day work but not necessarily workflow),Research planning (e.g., literature review, methodology research, hypothesis development) ,Experimental planning and design (e.g., any preparatory steps, supplies and materials planning and acquisition) ,Experimental set-up (e.g., preparing solutions, setting up equipment, organizing fume hood),Materials synthesis (e.g…		Materials characterization (e.g., sample preparation, NMR, XRD, chromatography, spectroscopy, mass spectrometry, etc.),Materials processing (e.g., treatment of materials into necessary form such as a film or powder),Data analysis, interpretation, and management (e.g., downloading raw data from instrumentation, cleaning and collating data, converting data from signal intensity into units that can …
25	Non-PI scientist	Mix of computational/theoretical and experimental		Private sector	I don’t have much experience with automation in the lab	0	40	Automating one of your data analysis steps	Time spent on set-up tasks, clean-up tasks, or troubleshooting	0	10	90	5	2	1	3	4	6	7		1	To do things that are completely impossible for a human to currently do (e.g., imagine you had four arms).	To do 10 syntheses at a time.	Synthesis of hypothetical compounds	Synthesis	I'm not sure which of synthesis and structure solving is rate limited, to be honest, but the process of doing both definitely is.	yes	Identifying "valuable" materials	Data interpretation	4	I think I'm a fan of anything and everything being automated, but I'd like to maintain a manual workflow (ideally with a good interface!) for crystal structure solution and design.	Validation	A lot		Somewhat positive	It would be technically challenging to implement and maintain effective automated processes		Somewhat increase	No (submit your responses and end the survey)
26	Non-PI scientist	Mostly computational/theoretical		Private sector	I'm really interested in the possibilities generated using automation in the lab								1	2	6	5	4	3	7		2	To do things that are completely impossible for a human to currently do (e.g., imagine you had four arms).	high-throughputly scanning parameters											A lot	Positive	I have no negative feelings		Significantly increase	No (submit your responses and end the survey)
27	Graduate student	Mostly experimental		University or academic research institution	I use automation (e.g., robotic arms or autosampler) that is already available in the lab	20	30	Automating one of your data analysis steps	Time spent on set-up tasks, clean-up tasks, or troubleshooting	40	10	50	1	5	6	4	3	2	7		1	To get rid of dull, dirty, or dangerous lab tasks.		Data analysis takes days to perform, which limits me to only two days of lab work a week	Data	Data analysis of large data sets both during and after experiments. If done during experiments, this would better inform me of whether or not I should proceed with the current experiment. If after experiments, this would allow me to more quickly look at the data that I collected and better prepare for my future experiments.	yes	Maintenance of the instrument that I use - it is a very manual task that requires a human to be present.	Experiment setup	10	I would not want research ideas automated	Objectives / hypotheses	Completely		Somewhat positive	It would be technically challenging to implement and maintain effective automated processes,Automation lessens the ability for scientific insight and/or research creativity		Significantly increase	Yes	No	Reactive,Corrosive,Flammable,Toxicity		Not at all	Somewhat increase	Some effort (e.g., minor lab renovation)	General lab tasks (e.g., part of day-to-day work but not necessarily workflow),Research planning (e.g., literature review, methodology research, hypothesis development) ,Experimental planning and design (e.g., any preparatory steps, supplies and materials planning and acquisition) ,Experimental set-up (e.g., preparing solutions, setting up equipment, organizing fume hood),Materials synthesis (e.g…		Performance testing of devices (e.g., device cycling tests),Data analysis, interpretation, and management (e.g., downloading raw data from instrumentation, cleaning and collating data, converting data from signal intensity into units that can be interpreted by the researcher, running statistical analysis, analyzing spectra),Data management (e.g., downloading raw data from instrumentation, cleanin…
28	Graduate student	Mostly experimental		University or academic research institution	I'm really interested in the possibilities generated using automation in the lab	40	30	Automating one of your data analysis steps	Time spent on set-up tasks, clean-up tasks, or troubleshooting	30	20	50	1	2	5	6	3	4	7		2	To get rid of dull, dirty, or dangerous lab tasks.		Sample prep for TEM...	Sample prep	Yes	yes	Generating interesting ideas about how to apply the tech to tackle real challenges.	Objectives / hypotheses / design	5	Maybe feel more controlled over the whole process and know which step could go south.	On-the-fly	Somewhat		Somewhat positive	There are tasks I really enjoy doing that I don’t want taken over by an automated process,Automation lessens the ability for scientific insight and/or research creativity		Somewhat decrease	No (submit your responses and end the survey)
29	Postdoctoral researcher	Mix of computational/theoretical and experimental		University or academic research institution	I'm really interested in the possibilities generated using automation in the lab	20	20	Automating one of your lab tasks	Time spent on set-up tasks, clean-up tasks, or troubleshooting	50	30	20	1	2	3	6	4	5	7		1	To get rid of dull, dirty, or dangerous lab tasks.		Cell preparation	Cell assembly	Yes	yes	The interpretation of the data.	Data interpretation	5	The measurement protocol. You can gain insights on the data and intuition by measuring more than automatizing the measurements.	Experiment design	Somewhat		Somewhat positive	I have no negative feelings		Somewhat increase	Yes	No	Reactive,Corrosive,Flammable,Toxicity		A little	Significantly increase	Some effort (e.g., minor lab renovation)	General lab tasks (e.g., part of day-to-day work but not necessarily workflow),Research planning (e.g., literature review, methodology research, hypothesis development) ,Experimental planning and design (e.g., any preparatory steps, supplies and materials planning and acquisition) ,Experimental set-up (e.g., preparing solutions, setting up equipment, organizing fume hood),Materials property measu…		General lab tasks (e.g., part of day-to-day work but not necessarily workflow),Device assembly (e.g., assembly or construction of a battery, probe, film or other device),Data analysis, interpretation, and management (e.g., downloading raw data from instrumentation, cleaning and collating data, converting data from signal intensity into units that can be interpreted by the researcher, running stat…
30	Graduate student	Mostly experimental		University or academic research institution	I consider myself an expert in automation in the lab	30	10	Automating one of your data analysis steps	Time spent on set-up tasks, clean-up tasks, or troubleshooting	25	10	65	5	6	1	2	3	4	7		2	To do things that are completely impossible for a human to currently do (e.g., imagine you had four arms).		Instron Testing Machine	Measurement	Instron Testing is already automated	no	None. Currently have fully automated workflow.	Nothing	0	None	Nothing	A little		Positive	I have no negative feelings		Somewhat increase	No (submit your responses and end the survey)
31	Graduate student	Mostly experimental		University or academic research institution	I'm really interested in the possibilities generated using automation in the lab,I use automation (e.g., robotic arms or autosampler) that is already available in the lab	9	40	Automating one of your lab tasks	Time spent on set-up tasks, clean-up tasks, or troubleshooting	29	40	30	2	5	6	3	1	4	7		2	To get rid of dull, dirty, or dangerous lab tasks.		Human speed	Other	Yes	yes	Idea generation, and protocol design	Objectives / hypotheses / design	9	Not much	Nothing	A lot		Positive	I have no negative feelings		Significantly increase	Yes	No	Corrosive,Toxicity,Carcinogen		A little	Somewhat increase	Some effort (e.g., minor lab renovation)	General lab tasks (e.g., part of day-to-day work but not necessarily workflow),Experimental planning and design (e.g., any preparatory steps, supplies and materials planning and acquisition) ,Experimental set-up (e.g., preparing solutions, setting up equipment, organizing fume hood),Device assembly (e.g., assembly or construction of a battery, probe, film or other device),Performance testing of d…		Experimental planning and design (e.g., any preparatory steps, supplies and materials planning and acquisition)
32	PI	Mostly experimental		University or academic research institution	I consider myself an expert in automation in the lab,I'm really interested in the possibilities generated using automation in the lab,I use automation (e.g., robotic arms or autosampler) that is already available in the lab	16	40	Automating one of your data analysis steps	Time spent on set-up tasks, clean-up tasks, or troubleshooting	10	30	71	6	2	1	4	5	3	7		3	To do things that are completely impossible for a human to currently do (e.g., imagine you had four arms).	Synthesiying an interphase/interface with a echem robot with an aprotic electrolyte formulated by a robot because we got told by an AI that works with other experimental data and computation from outside our lab	Coating electrodes and preparation of slurries and powders for them. Essentially everything leading up to a battery electrode	Cell assembly	Essentially everything leading up to a battery electrode from liquid precursors and foil.	yes	Any sticking mixing etc can be automated given € and time. What can not be automated (at the moment) if creative out of the box thinking. Need an example: Fast charging batteries beyond stepping up and down a current purely from data.	Objectives / hypotheses / design	10	Moving ready made battery cells to cycler simply because there is no added value but it would cost a lot of time. Had initially planned it.	Cost not justified	Somewhat		Somewhat positive	It would be technically challenging to implement and maintain effective automated processes		Significantly increase	Yes	No	Reactive,Corrosive,Flammable,Pyrophoric,Toxicity,Carcinogen,Physical: sharps,Physical: heavy items,Other	Pinching	Not at all	Neither increase nor decrease	No effort (automation can be installed without reconfiguration)	Research planning (e.g., literature review, methodology research, hypothesis development) ,Experimental planning and design (e.g., any preparatory steps, supplies and materials planning and acquisition) ,Experimental set-up (e.g., preparing solutions, setting up equipment, organizing fume hood),Materials synthesis (e.g., collecting and manipulating samples in glove box, performing chemical reacti…		Research planning (e.g., literature review, methodology research, hypothesis development) ,Experimental planning and design (e.g., any preparatory steps, supplies and materials planning and acquisition) ,Experimental set-up (e.g., preparing solutions, setting up equipment, organizing fume hood)
33	Postdoctoral researcher	Mostly experimental		University or academic research institution	I'm really interested in the possibilities generated using automation in the lab,I use automation (e.g., robotic arms or autosampler) that is already available in the lab	40	14	Automating one of your data analysis steps	Time spent on set-up tasks, clean-up tasks, or troubleshooting	15	11	32	4	5	6	3	2	1	7		3	To do things that are completely impossible for a human to currently do (e.g., imagine you had four arms).	To precisely control the experiment conditions and easily reproduce among different labs	To set up the platform for high-throughput synthesis	Experiment setup	Data analysis as it helps prevent unprofessional data processing.	no	The nanoparticle synthesis could not achieve 100% reproducibility due to instrument reasons	Synthesis	10	Furnace setup. It requires a bit of experience to set up the furnace and annealing program. Not sure if the automation level is sufficient for this part.	Cost not justified	A lot		Positive	I have no negative feelings		Somewhat increase	Yes	No	Reactive,Corrosive,Flammable		A little	Somewhat increase	Little effort (e.g., minimum renovation and equipment movement)	Research planning (e.g., literature review, methodology research, hypothesis development) ,Experimental planning and design (e.g., any preparatory steps, supplies and materials planning and acquisition) ,Experimental set-up (e.g., preparing solutions, setting up equipment, organizing fume hood),Materials synthesis (e.g., collecting and manipulating samples in glove box, performing chemical reacti…		Materials synthesis (e.g., collecting and manipulating samples in glove box, performing chemical reactions, heating, cooling, stirring, furnace combustion),Materials characterization (e.g., sample preparation, NMR, XRD, chromatography, spectroscopy, mass spectrometry, etc.),Materials property measurements (e.g., understanding qualitative or quantitative properties of a material)
34	Graduate student	Mix of computational/theoretical and experimental		University or academic research institution	I use automation (e.g., robotic arms or autosampler) that is already available in the lab	25	12	Automating one of your data analysis steps	Time spent on set-up tasks, clean-up tasks, or troubleshooting	53	27	88	2	1	4	6	5	3	7		2	To do things that are completely impossible for a human to currently do (e.g., imagine you had four arms).		Preparation of sample	Sample prep	Yes	yes	building of samples	Sample prep	8	Nil	Nothing	A lot		Somewhat positive	I have no negative feelings		Significantly increase	Yes	No	My role presents no safety concerns					Research planning (e.g., literature review, methodology research, hypothesis development) ,Experimental planning and design (e.g., any preparatory steps, supplies and materials planning and acquisition) ,Experimental set-up (e.g., preparing solutions, setting up equipment, organizing fume hood),Materials property measurements (e.g., understanding qualitative or quantitative properties of a materi…		Experimental set-up (e.g., preparing solutions, setting up equipment, organizing fume hood)
35	Graduate student	Mostly experimental		University or academic research institution	I'm really interested in the possibilities generated using automation in the lab,I don’t have much experience with automation in the lab	40	8	Automating one of your lab tasks	Time spent on set-up tasks, clean-up tasks, or troubleshooting	30	29	71	1	3	6	2	4	5	7		2	To get rid of dull, dirty, or dangerous lab tasks.	screening parameter space in electrode position process	Limited facilities and time to fabricate multiple samples at the same time or in a day (when I am not around)	Synthesis	Yeah, it is the rate limiting step	yes	Data analysis and troubleshooting	Data interpretation	5	Procedure optimization or other process requires intellectual inputs.	Experiment design	A lot		Somewhat positive	There are tasks I really enjoy doing that I don’t want taken over by an automated process,Automation lessens the ability for scientific insight and/or research creativity		Somewhat increase	Yes	No	Reactive,Corrosive,Flammable,Pyrophoric,Toxicity,Physical: sharps		Somewhat	Somewhat increase	A lot of effort (e.g., major lab renovation or entirely new space needed)	General lab tasks (e.g., part of day-to-day work but not necessarily workflow),Research planning (e.g., literature review, methodology research, hypothesis development) ,Experimental planning and design (e.g., any preparatory steps, supplies and materials planning and acquisition) ,Experimental set-up (e.g., preparing solutions, setting up equipment, organizing fume hood),Materials synthesis (e.g…		Research planning (e.g., literature review, methodology research, hypothesis development) ,Materials synthesis (e.g., collecting and manipulating samples in glove box, performing chemical reactions, heating, cooling, stirring, furnace combustion),Materials characterization (e.g., sample preparation, NMR, XRD, chromatography, spectroscopy, mass spectrometry, etc.)
36	Graduate student	Mostly computational/theoretical		National or international government-funded laboratory	I'm really interested in the possibilities generated using automation in the lab								3	5	4	6	2	1	7		3	To do things that are completely impossible for a human to currently do (e.g., imagine you had four arms).	Removing human factors for sensitive experiments for reproducibility and uncertainty quantification											A lot	Somewhat positive	I have no negative feelings		Neither increase nor decrease	Yes	Yes
37	Graduate student	Mostly experimental		University or academic research institution	I'm really interested in the possibilities generated using automation in the lab	20	15	Automating one of your lab tasks	Time spent on set-up tasks, clean-up tasks, or troubleshooting	25	5	70	3	5	4	6	1	2	7		2	To do things that are completely impossible for a human to currently do (e.g., imagine you had four arms).	With automation one is able to prepare large enough amount of samples in a single working day which would possibly cost a whole week if done by human.	Setup and preparation for the workflow	Experiment setup	No, the cost and complicity of automating this step would be unexpectable.	no	Theoretically there is no bottleneck to automate the whole workflow, actually, it's only a matter of time and labor to implement the process of designing and building of the automated lab research	Nothing	8	None	Nothing	Completely		Positive	It would be technically challenging to implement and maintain effective automated processes		Significantly increase	No (submit your responses and end the survey)
38	Graduate student	Mostly computational/theoretical		University or academic research institution	I am not currently interested in using automation in the lab								4	3	2	5	6	1	7		1	To get rid of dull, dirty, or dangerous lab tasks.												Not at all	Neutral	It would be technically challenging to implement and maintain effective automated processes		Somewhat decrease	No (submit your responses and end the survey)
39	Graduate student	Mostly computational/theoretical		University or academic research institution	I'm really interested in the possibilities generated using automation in the lab								1	5	6	4	7	2	3	more time to work on the understanding the theory	2	To do things that are completely impossible for a human to currently do (e.g., imagine you had four arms).	Decrease the experimental data generation time, for example, long term cycling data of lithium-ion batteries.											A lot	Positive	I have no negative feelings		Somewhat increase	No (submit your responses and end the survey)
40	Graduate student	Mostly computational/theoretical		University or academic research institution	I don’t have much experience with automation in the lab								1	4	5	6	3	2	7		2	To get rid of dull, dirty, or dangerous lab tasks.	Lab Safety related issues											A lot	Somewhat positive	It would be technically challenging to implement and maintain effective automated processes		Somewhat increase	No (submit your responses and end the survey)
41	Graduate student	Mostly experimental		University or academic research institution	I'm really interested in the possibilities generated using automation in the lab	40	10	Automating one of your lab tasks	Time spent on set-up tasks, clean-up tasks, or troubleshooting	50	30	30	1	2	6	4	5	3	7		1	To get rid of dull, dirty, or dangerous lab tasks.	I am doing polymer electrodeposition. The electrodeposition protocol is very dull and time-consuming. I spend a lot of time making solutions and waiting for the potentiostat to complete the deposition. There are many parameters (like different solvents, reagent concentration, and potential) worth to be screened.	substrate preparation for electrochemistry(fabricating and cleaning) and solution preparation	Sample prep	yes	yes	compatibility between different instruments.i.e how potentiostat collaborates with robots for solution making	Integration	10	Automation is the future. You can't be against the future.	Nothing	Completely		Positive	I have no negative feelings		Significantly increase	Yes	No	Reactive,Corrosive,Flammable,Toxicity,Carcinogen		Somewhat	Somewhat increase	Some effort (e.g., minor lab renovation)	Research planning (e.g., literature review, methodology research, hypothesis development) ,Experimental planning and design (e.g., any preparatory steps, supplies and materials planning and acquisition) ,Experimental set-up (e.g., preparing solutions, setting up equipment, organizing fume hood),Materials synthesis (e.g., collecting and manipulating samples in glove box, performing chemical reacti…		Experimental planning and design (e.g., any preparatory steps, supplies and materials planning and acquisition) ,Experimental set-up (e.g., preparing solutions, setting up equipment, organizing fume hood),Data analysis, interpretation, and management (e.g., downloading raw data from instrumentation, cleaning and collating data, converting data from signal intensity into units that can be interpre…
42	Graduate student	Mix of computational/theoretical and experimental		University or academic research institution	I'm really interested in the possibilities generated using automation in the lab	10	30	Automating one of your data analysis steps	Time spent on set-up tasks, clean-up tasks, or troubleshooting	30	50	20	1	5	2	6	3	4	7		2	To get rid of dull, dirty, or dangerous lab tasks.	Put cells onto the cycler, degas cells, fill electrolyte into the cells	experiment prep - taking cells into and out of the glovebox and cleaning	Experiment setup	yes	yes	Put cells into the cyclers, since it needs many adjustments and I am not sure how robots can do that easily	Experiment setup	10	generating hypotheses or investigating interesting trends because this needs domain knowledge and I do not think robots can do this	Objectives / hypotheses	Not at all		Positive	I have no negative feelings		Significantly increase	No (submit your responses and end the survey)
43	Graduate student	Mostly experimental		University or academic research institution	I'm really interested in the possibilities generated using automation in the lab,I don’t have much experience with automation in the lab	30	20	Automating one of your lab tasks	Time spent on set-up tasks, clean-up tasks, or troubleshooting	20	40	40	2	3	5	6	1	4	7		1	To get rid of dull, dirty, or dangerous lab tasks.	Putting together an electrochemical cell (tightening screws, stacking components)	Lack of reproducibility of cell construction causing issues like leaking, inconsistent measurements	Cell assembly	Yes	yes	Interpreting data and forming hypotheses the explain trends	Data interpretation	3	I would not want data analysis fully automated, as I believe that sometimes by processing data step by step you can notice trends/irregularities that do not appear in the fully processed result	Data interpretation	A lot		Somewhat negative	It would be technically challenging to implement and maintain effective automated processes,I wouldn’t trust an automated process to do the job effectively		Somewhat increase	Yes	No	Reactive,Corrosive,Flammable,Toxicity,Carcinogen,Physical: sharps,Physical: heavy items		A little	Somewhat increase	Some effort (e.g., minor lab renovation)	General lab tasks (e.g., part of day-to-day work but not necessarily workflow),Research planning (e.g., literature review, methodology research, hypothesis development) ,Experimental planning and design (e.g., any preparatory steps, supplies and materials planning and acquisition) ,Experimental set-up (e.g., preparing solutions, setting up equipment, organizing fume hood),Materials characterizati…		Research planning (e.g., literature review, methodology research, hypothesis development) ,Experimental set-up (e.g., preparing solutions, setting up equipment, organizing fume hood),Device assembly (e.g., assembly or construction of a battery, probe, film or other device)
44	PI	Mix of computational/theoretical and experimental		National or international government-funded laboratory	I don’t have much experience with automation in the lab	1	40	Automating one of your data analysis steps	Time spent on set-up tasks, clean-up tasks, or troubleshooting	10	10	80	1	5	6	2	4	3	7		1	To get rid of dull, dirty, or dangerous lab tasks.	Experimental microscopy is very repetitive, a lot of time is spend scanning around and tilting the sample which could be partially or fully automated.	Sample prep for TEM and TEM microscope time	Sample prep	Automating sample prep would be amazing, but likely too difficult / expensive for our heterogeneous samples. So I'd rather automate routine microscope to get better statistics / free up researcher time.	no	Generating hypotheses, modeling data.	Objectives / hypotheses / design	5	Nothing! Let the machines do the work.	Nothing	Completely		Somewhat positive	It would be technically challenging to implement and maintain effective automated processes,I wouldn’t trust an automated process to do the job effectively		Somewhat increase	No (submit your responses and end the survey)
45	Graduate student	Mostly computational/theoretical		University or academic research institution	I don’t have much experience with automation in the lab								1	2	3	4	6	5	7		1	To get rid of dull, dirty, or dangerous lab tasks.												Not at all	Neutral	I have no negative feelings		Neither increase nor decrease	No (submit your responses and end the survey)
46	PI	Mix of computational/theoretical and experimental		University or academic research institution	I consider myself an expert in automation in the lab	0	40	Automating one of your lab tasks	Getting access to the equipment you need (e.g., bench space, instrument time)	9	9	81	4	5	6	3	1	2	7		3	To do things that are completely impossible for a human to currently do (e.g., imagine you had four arms).	Fully automate a fast, robust, reliable, efficient workflow for the development of a process for manufacturing a product -- with no humans in the loop.	Getting experimentalists to define error-free, robust, reliable protocols associated with certain types of characterization equipment, e.g., mass spectrometry, HPLC - to translate equipment readings to process or materials properties, e.g., species compositions.	Integration	if I could automate the above bottleneck step, then I would. Unfortunately, domain expertise is required for experimentalists to define error-free, robust, reliable protocols associated with certain types of characterization equipment, e.g., mass spectrometry, HPLC - to translate equipment readings to process or materials properties, e.g., species compositions. If that domain expertise was not ne…	no	Defining error-free, robust, reliable protocols associated with certain types of characterization equipment, e.g., mass spectrometry, HPLC - to translate equipment readings to process or materials properties, e.g., species compositions.	Integration	0	Automating specific well-defined steps is easy and my group does that all of the time. My research is to automate all decision processes which are the higher level decision making currently done by experimentalists. We have made substantial progress at that level. I would not want to automate the higher level decision of what type of material to make, or what property requirements the material sh…	Objectives / hypotheses	Somewhat		Positive	I have no negative feelings,Other	many of the questions in this survey are worded in a way that makes the selection of an answer somewhat nonsensical, in that my research lab is already highly automated as that is a component of my research. for example, the question "To what extent do you think increasing automation in your current workflow will change the nature of your work?" results in answers sounding negative when answered …	Significantly increase	Yes	Yes
47	Non-PI scientist	Mix of computational/theoretical and experimental		National or international government-funded laboratory	I'm really interested in the possibilities generated using automation in the lab,I don’t have much experience with automation in the lab	40	40	Automating one of your data analysis steps	Time spent on set-up tasks, clean-up tasks, or troubleshooting	92	92	93	1	5	2	6	4	3	7		2	To do things that are completely impossible for a human to currently do (e.g., imagine you had four arms).		Development of new code	Integration	Using existing analysis	no	-		8	-		A lot		Neutral	I have no negative feelings		Somewhat increase	No (submit your responses and end the survey)
48	PI	Mostly computational/theoretical		University or academic research institution	I don’t have much experience with automation in the lab								3	5	6	1	2	4	7		1	To do things that are completely impossible for a human to currently do (e.g., imagine you had four arms).												Somewhat	Neutral	I have no negative feelings		Somewhat increase	Yes	Yes
49	Postdoctoral researcher	Mostly experimental		University or academic research institution	I'm really interested in the possibilities generated using automation in the lab	30	10	Automating one of your lab tasks	Time spent on set-up tasks, clean-up tasks, or troubleshooting	30	40	30	1	2	3	4	5	6	7		2	To do things that are completely impossible for a human to currently do (e.g., imagine you had four arms).	Increased speed and setting up more experiments simultaneously	Thermal annealing for sample synthesis. Electrochemical testing.	Synthesis	Automation of sample preparation would be better, but cannot automate/increase the speed of the actual synthesis steps besides performing more in parallel.	no	Synthesis speed per sample.	Synthesis	3	Experiment design	Experiment design	Somewhat		Positive	It would be technically challenging to implement and maintain effective automated processes		Significantly increase	Yes	No	Reactive,Corrosive,Flammable,Pyrophoric,Toxicity,Carcinogen,Physical: sharps		Somewhat	Significantly increase	Some effort (e.g., minor lab renovation)	General lab tasks (e.g., part of day-to-day work but not necessarily workflow),Research planning (e.g., literature review, methodology research, hypothesis development) ,Experimental planning and design (e.g., any preparatory steps, supplies and materials planning and acquisition) ,Experimental set-up (e.g., preparing solutions, setting up equipment, organizing fume hood),Materials synthesis (e.g…		Research planning (e.g., literature review, methodology research, hypothesis development) ,Experimental planning and design (e.g., any preparatory steps, supplies and materials planning and acquisition) ,Materials characterization (e.g., sample preparation, NMR, XRD, chromatography, spectroscopy, mass spectrometry, etc.)
50	Graduate student	Mostly experimental		University or academic research institution	I'm really interested in the possibilities generated using automation in the lab	40	20	Automating one of your lab tasks	Time spent on set-up tasks, clean-up tasks, or troubleshooting	39	40	21	1	2	3	6	4	5	7		1	To do things that are completely impossible for a human to currently do (e.g., imagine you had four arms).		material synthesis (synthetic chemistry), sample prep for EIS (chiefly drying steps)	Synthesis	mo; many different actions are needed for material prep. It would be exceptionally hard for a robot to do all of them well.	no	material synthesis	Synthesis	2	if anything could be automated, id automate all of it	Nothing	Somewhat		Somewhat negative	It would be technically challenging to implement and maintain effective automated processes		Somewhat increase	No (submit your responses and end the survey)
51	Graduate student	Mostly experimental		University or academic research institution	I use automation (e.g., robotic arms or autosampler) that is already available in the lab	15	25	Automating one of your lab tasks	Time spent on set-up tasks, clean-up tasks, or troubleshooting	30	20	50	3	5	6	4	2	1	7		3	To get rid of dull, dirty, or dangerous lab tasks.		Cell fabrication	Cell assembly	Move sample from one station to another back and forth	no	NMR, cell sealing with a heat sealer	Other	10	Hypothesis generation, because I enjoy it.	Objectives / hypotheses	A lot		Positive	I have no negative feelings		Significantly increase	No (submit your responses and end the survey)
52	PI	Mostly computational/theoretical		National or international government-funded laboratory	I'm really interested in the possibilities generated using automation in the lab,I use automation (e.g., robotic arms or autosampler) that is already available in the lab								1	5	6	4	3	2	7		2	To get rid of dull, dirty, or dangerous lab tasks.	Conventional synthesis of new compounds is too dull for most academic groups to engage in - high risk of not finding anything, low reward if something is found											Completely	Positive	It would be technically challenging to implement and maintain effective automated processes		Significantly increase	No (submit your responses and end the survey)
53	Graduate student	Mostly computational/theoretical		University or academic research institution	I'm really interested in the possibilities generated using automation in the lab								1	4	5	6	2	3	7		3	To get rid of dull, dirty, or dangerous lab tasks.	Generating large amounts of experimental data w/o automation requires incredible amounts of time--being able to free a researcher to focus on different tasks rather than do the same experiment over-and-over again seems invaluable.											A lot	Positive	It would be technically challenging to implement and maintain effective automated processes		Somewhat increase	Yes	Yes
54	PI	Mostly experimental		University or academic research institution	I use automation (e.g., robotic arms or autosampler) that is already available in the lab	0	40	Automating one of your data analysis steps	Time spent on set-up tasks, clean-up tasks, or troubleshooting	33	33	33	5	3	1	2	4	6	7		1	To do things that are completely impossible for a human to currently do (e.g., imagine you had four arms).		formulation and electrochemical testing of new materials for electrolytes.	Synthesis	yes.	yes	I don't think robots can have the synthetic chemistry versatility of humans in the near future.	Synthesis	10	Nothing.	Nothing	Completely		Neutral	It would be technically challenging to implement and maintain effective automated processes,I wouldn’t trust an automated process to do the job effectively,Automation lessens the ability for scientific insight and/or research creativity		Neither increase nor decrease	Yes	No	Reactive,Corrosive,Flammable,Pyrophoric,Toxicity,Carcinogen,Physical: sharps,Physical: heavy items		Not at all	Neither increase nor decrease	A lot of effort (e.g., major lab renovation or entirely new space needed)	General lab tasks (e.g., part of day-to-day work but not necessarily workflow),Research planning (e.g., literature review, methodology research, hypothesis development) ,Experimental planning and design (e.g., any preparatory steps, supplies and materials planning and acquisition) ,Experimental set-up (e.g., preparing solutions, setting up equipment, organizing fume hood),Materials synthesis (e.g…		Materials synthesis (e.g., collecting and manipulating samples in glove box, performing chemical reactions, heating, cooling, stirring, furnace combustion),Materials characterization (e.g., sample preparation, NMR, XRD, chromatography, spectroscopy, mass spectrometry, etc.),Materials processing (e.g., treatment of materials into necessary form such as a film or powder)
55	Graduate student	Mostly computational/theoretical		University or academic research institution	I'm really interested in the possibilities generated using automation in the lab								1	5	6	3	2	4	7		1	To get rid of dull, dirty, or dangerous lab tasks.	Reducing cell-to-cell variance in generating operational data, upon which analysis will be done.											A little	Somewhat positive	I have no negative feelings		Somewhat increase	Yes	Yes
56	Postdoctoral researcher	Mostly computational/theoretical		Private sector	I'm really interested in the possibilities generated using automation in the lab								2	5	6	1	4	3	7		2	To do things that are completely impossible for a human to currently do (e.g., imagine you had four arms).												Somewhat	Somewhat positive	It would be technically challenging to implement and maintain effective automated processes,I wouldn’t trust an automated process to do the job effectively,Automation lessens the ability for scientific insight and/or research creativity		Neither increase nor decrease	Yes	Yes
57	Non-PI scientist	Mix of computational/theoretical and experimental		University or academic research institution	I consider myself an expert in automation in the lab,I use automation (e.g., robotic arms or autosampler) that is already available in the lab	10	30	Automating one of your lab tasks	Time spent on set-up tasks, clean-up tasks, or troubleshooting	5	75	20	2	5	3	1	6	4	7		2	To get rid of dull, dirty, or dangerous lab tasks.		Measurement quality control	Measurement	Yes	yes	Integrating new instrumentation into our control software	Integration	2	nothing comes to mind	Nothing	Somewhat		Positive	Automation lessens the ability for scientific insight and/or research creativity		Somewhat increase	No (submit your responses and end the survey)
58	Graduate student	Mostly experimental		University or academic research institution	I'm really interested in the possibilities generated using automation in the lab,I use automation (e.g., robotic arms or autosampler) that is already available in the lab	40	40	Automating one of your data analysis steps	Getting access to the equipment you need (e.g., bench space, instrument time)	20	30	50	1	6	5	2	4	3	7		2	To get rid of dull, dirty, or dangerous lab tasks.	Automating instrument operation, like clicking buttons over and over again.	Data processing and analysis	Data	I would automate the data processing as much as possible.	yes	Generating hypotheses and designing experiments.	Objectives / hypotheses / design	10	High-fidelity TEM. I'd automate all the low-fidelity measurements, but I like looking at the interesting samples myself.	On-the-fly	A lot		Positive	There are tasks I really enjoy doing that I don’t want taken over by an automated process,It would be technically challenging to implement and maintain effective automated processes,It may decrease the value of the research field		Neither increase nor decrease	Yes	No	Reactive,Corrosive,Flammable,Toxicity,Carcinogen,Physical: sharps		Somewhat	Somewhat increase	Some effort (e.g., minor lab renovation)	General lab tasks (e.g., part of day-to-day work but not necessarily workflow),Research planning (e.g., literature review, methodology research, hypothesis development) ,Experimental planning and design (e.g., any preparatory steps, supplies and materials planning and acquisition) ,Experimental set-up (e.g., preparing solutions, setting up equipment, organizing fume hood),Materials synthesis (e.g…		Materials synthesis (e.g., collecting and manipulating samples in glove box, performing chemical reactions, heating, cooling, stirring, furnace combustion),Materials characterization (e.g., sample preparation, NMR, XRD, chromatography, spectroscopy, mass spectrometry, etc.),Data analysis, interpretation, and management (e.g., downloading raw data from instrumentation, cleaning and collating data,…
59	Postdoctoral researcher	Mostly computational/theoretical		National or international government-funded laboratory	I don’t have much experience with automation in the lab								4	5	6	1	2	3	7		2	To do things that are completely impossible for a human to currently do (e.g., imagine you had four arms).												A lot	Somewhat positive	I wouldn’t trust an automated process to do the job effectively,Automation lessens the ability for scientific insight and/or research creativity		Neither increase nor decrease	No (submit your responses and end the survey)
60	Graduate student	Mostly experimental		University or academic research institution	I'm really interested in the possibilities generated using automation in the lab,I don’t have much experience with automation in the lab	40	6	Automating one of your lab tasks	Time spent on set-up tasks, clean-up tasks, or troubleshooting	5	70	25	1	3	2	5	4	6	7		2	To get rid of dull, dirty, or dangerous lab tasks.	Syringe filtering, cleaning glassware with dangerous chemicals such as piranha	Troubleshooting	Other	Syringe filtering electrolyte, it’s not quite as rate limiting as troubleshooting but it’s very time-consuming	no	Troubleshooting my flow cell setup, I don’t think a robot can optimize experimental setup	Experiment setup	5	Flow cell setup	On-the-fly	A lot		Somewhat positive	It would be technically challenging to implement and maintain effective automated processes,I wouldn’t trust an automated process to do the job effectively		Somewhat increase	Yes	No	Toxicity,Physical: heavy items		A little	Somewhat increase	A lot of effort (e.g., major lab renovation or entirely new space needed)	General lab tasks (e.g., part of day-to-day work but not necessarily workflow),Research planning (e.g., literature review, methodology research, hypothesis development) ,Experimental planning and design (e.g., any preparatory steps, supplies and materials planning and acquisition) ,Experimental set-up (e.g., preparing solutions, setting up equipment, organizing fume hood),Materials characterizati…		Experimental set-up (e.g., preparing solutions, setting up equipment, organizing fume hood)
61
62
63
64	Other	Mix of computational/theoretical and experimental		Private sector	I don’t have much experience with automation in the lab
65	Postdoctoral researcher	Mostly computational/theoretical		Private sector	I'm really interested in the possibilities generated using automation in the lab								5	1	2	3	4	6	7		2	To do things that are completely impossible for a human to currently do (e.g., imagine you had four arms).
66	Non-PI scientist	Mix of computational/theoretical and experimental		University or academic research institution	I consider myself an expert in automation in the lab,I use automation (e.g., robotic arms or autosampler) that is already available in the lab	10	30	Automating one of your lab tasks	Time spent on set-up tasks, clean-up tasks, or troubleshooting	5	75	20	2	4	5	1	6	3	7		2	To get rid of dull, dirty, or dangerous lab tasks.	Repetitive tasks such as draining and filling an electrochemical cell, loading electrodes, performing cleaning and maintenance steps in between experiments, and processing raw data for analysis.
67	Graduate student	Mostly experimental		University or academic research institution	I'm really interested in the possibilities generated using automation in the lab,I use automation (e.g., robotic arms or autosampler) that is already available in the lab	25	15	Automating one of your data analysis steps	Getting access to the equipment you need (e.g., bench space, instrument time)	10	20	70	4	6	5	1	3	2	7		2	To do things that are completely impossible for a human to currently do (e.g., imagine you had four arms).		data evaluation	Data	data evaluation (rate limiting step)	yes	generating scientific hypotheses	Objectives / hypotheses / design	2	nothing, automate everything	Nothing	Somewhat		Positive	I have no negative feelings		Somewhat increase
68	Graduate student	Mostly experimental		University or academic research institution	I'm really interested in the possibilities generated using automation in the lab,I don’t have much experience with automation in the lab	35	15	Automating one of your lab tasks	Time spent on set-up tasks, clean-up tasks, or troubleshooting	20	40	40	2	4	5	6	1	3	7		1	To get rid of dull, dirty, or dangerous lab tasks.	Building a reactor - screwing together pieces
69	Postdoctoral researcher	Mostly experimental		University or academic research institution	I'm really interested in the possibilities generated using automation in the lab,I use automation (e.g., robotic arms or autosampler) that is already available in the lab	25	30	Automating one of your lab tasks	Time spent on set-up tasks, clean-up tasks, or troubleshooting	20	60	40
70	PI	Mostly computational/theoretical		University or academic research institution	I consider myself an expert in automation in the lab								5	1	2	4	6	3	7		2	To do things that are completely impossible for a human to currently do (e.g., imagine you had four arms).	Run 10^10 in calculations in a very short amount of time so that the user/researcher can focus on developing better devices and products											A lot	Positive	I have no negative feelings		Significantly increase	Yes	Yes
71	Graduate student	Mostly computational/theoretical		University or academic research institution	I'm really interested in the possibilities generated using automation in the lab
72	Non-PI scientist	Mostly computational/theoretical		Private sector	I'm really interested in the possibilities generated using automation in the lab
73	Other	Mix of computational/theoretical and experimental		University or academic research institution	I don’t have much experience with automation in the lab
74	Graduate student	Mostly computational/theoretical		University or academic research institution	I don’t have much experience with automation in the lab								3	4	1	5	2	6	7		2	To get rid of dull, dirty, or dangerous lab tasks.
75	Postdoctoral researcher	Mostly computational/theoretical		University or academic research institution	I don’t have much experience with automation in the lab
76	Non-PI scientist
77	Other
78	PI
79	Graduate student	Mostly computational/theoretical		University or academic research institution	I'm really interested in the possibilities generated using automation in the lab,I don’t have much experience with automation in the lab								2	5	6	4	3	1	7		2	To do things that are completely impossible for a human to currently do (e.g., imagine you had four arms).												A lot	Somewhat negative	There are tasks I really enjoy doing that I don’t want taken over by an automated process		Somewhat increase	No (submit your responses and end the survey)
80	Postdoctoral researcher	Mostly computational/theoretical		University or academic research institution	I'm really interested in the possibilities generated using automation in the lab								4	5	1	6	2	3	7		2	To do things that are completely impossible for a human to currently do (e.g., imagine you had four arms).												Completely	Positive	It would be technically challenging to implement and maintain effective automated processes		Significantly increase	Yes	Yes
81	Graduate student	Mostly experimental		University or academic research institution	I'm really interested in the possibilities generated using automation in the lab,I don’t have much experience with automation in the lab	40	10	Automating one of your lab tasks	Time spent on set-up tasks, clean-up tasks, or troubleshooting	30	60	10	1	4	6	5	2	3	7		2	To get rid of dull, dirty, or dangerous lab tasks.	A lot of my synthesis techniques involve time consuming repetitive processing steps using a variety of sintering furnaces, ball milling steps etc. synthesis of 1 composition can take anywhere from 6 - 15 h of work.	Bulk sample preparation and related processing using powder metallurgical routes.	Sample prep	Yes; rate limit step.	yes	Data analysis and intuition based inference. It is possible to automate data analysis and generate reports, however intuition based inference of the data is something that may be difficult to automate. For example, powder metallurgy may be affected by starting powder feedstock, impurities from grinding media etc. which can affect phase evolution. This is independent of the target composition. Pro…	Data interpretation	10	I think automation is the future; however I would always like to have an easy way to perform the process manually so I know whether the data coming out is reliable or realistic. My concern with automation is the introduction of black-boxes into materials research; where people place too much reliance onto a tool without understanding what it really does.	Validation	A lot		Positive	It would be technically challenging to implement and maintain effective automated processes		Somewhat increase	Yes	No	Reactive,Corrosive,Flammable,Pyrophoric,Toxicity,Carcinogen,Physical: sharps,Physical: heavy items		A little	Neither increase nor decrease	A lot of effort (e.g., major lab renovation or entirely new space needed)	General lab tasks (e.g., part of day-to-day work but not necessarily workflow),Research planning (e.g., literature review, methodology research, hypothesis development) ,Experimental planning and design (e.g., any preparatory steps, supplies and materials planning and acquisition) ,Experimental set-up (e.g., preparing solutions, setting up equipment, organizing fume hood),Materials synthesis (e.g…		Experimental set-up (e.g., preparing solutions, setting up equipment, organizing fume hood),Materials synthesis (e.g., collecting and manipulating samples in glove box, performing chemical reactions, heating, cooling, stirring, furnace combustion),Materials processing (e.g., treatment of materials into necessary form such as a film or powder)
82	PI	Mostly experimental		Private sector	I'm really interested in the possibilities generated using automation in the lab	2	40	Automating one of your data analysis steps	Getting access to the equipment you need (e.g., bench space, instrument time)	26	50	24	3	5	6	4	1	2	7		2	To do things that are completely impossible for a human to currently do (e.g., imagine you had four arms).	Long-term cell testing setup and operation	Electrochemical cell prep and test stand availability	Cell assembly	Yes, cell preparation	yes	Data interpretation	Data interpretation	4	Data interpretation, because we need to learn insights.	Data interpretation	A lot		Neutral	It would be technically challenging to implement and maintain effective automated processes		Neither increase nor decrease	No (submit your responses and end the survey)
83	Graduate student	Mostly computational/theoretical		University or academic research institution	I consider myself an expert in automation in the lab								4	1	5	6	3	2	7		1	To get rid of dull, dirty, or dangerous lab tasks.	Manual alloy discovery involves mixing powders according to predetermined weight ratios, melting and processing (e.g., arc melting, SPS, induction furnace), and characterizing mechanical properties (e.g., hardness measurements, tensile tests), and trying to decide which experiments to run next.											Completely	Positive	It would be technically challenging to implement and maintain effective automated processes		Significantly increase	No (submit your responses and end the survey)
84	PI	Mix of computational/theoretical and experimental		Private sector	I'm really interested in the possibilities generated using automation in the lab,I don’t have much experience with automation in the lab	8	35	Automating one of your data analysis steps	Time spent on set-up tasks, clean-up tasks, or troubleshooting	25	50	26	3	4	6	2	1	5	7		2	To do things that are completely impossible for a human to currently do (e.g., imagine you had four arms).		Continuous iteration over material synthesis and subsequent multimodal characterization.	Synthesis	Not sure .	no	Outlier assessment, in other words data points that fall out of search space but may be of importance.	Data interpretation	7	Not sure.		A lot		Somewhat positive	Automation lessens the ability for scientific insight and/or research creativity		Somewhat decrease	Yes	Yes
85	Postdoctoral researcher	Mix of computational/theoretical and experimental		University or academic research institution	I use automation (e.g., robotic arms or autosampler) that is already available in the lab	8	35	Automating one of your data analysis steps	Time spent on set-up tasks, clean-up tasks, or troubleshooting	9	20	92	2	6	4	5	1	3	7		1	To get rid of dull, dirty, or dangerous lab tasks.		stock solution preparation and search of arbitrarily large of design spaces	Experiment setup	analysis of characterization data from multiple instruments	no	Extracting scientific 'knowledge' from data obtained or experiments performed to guide design rules and understading	Data interpretation	10	Generating hypothesis, I enjoy serendipity driven discovery component in research	Objectives / hypotheses	A lot		Positive	I have no negative feelings		Significantly increase	Yes	Yes
86	PI	Mostly experimental		University or academic research institution	I'm really interested in the possibilities generated using automation in the lab	16	24	Automating one of your lab tasks	Time spent on set-up tasks, clean-up tasks, or troubleshooting	70	20	10	1	6	4	5	3	2	7		3	To get rid of dull, dirty, or dangerous lab tasks.		Sample preperation for nanoscale characterization	Sample prep	Yes, rate is limiting factor	yes	Interpreting the analysis results	Data interpretation	10	Scientific interpretation.	Data interpretation	A lot		Positive	It would be technically challenging to implement and maintain effective automated processes		Significantly increase	No (submit your responses and end the survey)
87	Other	Mostly experimental		National or international government-funded laboratory	I'm really interested in the possibilities generated using automation in the lab,I use automation (e.g., robotic arms or autosampler) that is already available in the lab	25	15	Automating one of your data analysis steps	Time spent on set-up tasks, clean-up tasks, or troubleshooting	17	17	66	1	4	6	2	5	3	7		2	To get rid of dull, dirty, or dangerous lab tasks.	Changing samples, align samples, preparing new samples, decision making on next step, adjusting range of interest	Since we have users coming to our facility, it varies a lot! But common bottleneck is sample change, data acquisition optimization, preliminary data analysis for next step	Experiment setup	It would be the preliminary data analysis for the next step. It would only speed up some experiments, but it would save a lot of time for some time consumung experiments and would increase drastically the change for meaningful outcome of the experiment and faster progress in tackling the problem.	yes	Setup of non-standard complex sample environment embedded in the infrastructure of our experimental station	Experiment setup	3	Anything that put a high risk on humans or equipment. In that case, I would prefer a hybrid approach, i.e. automation but asking for feedback from human for double checking	Hazardous experiments	Completely		Positive	It would be technically challenging to implement and maintain effective automated processes,Automation lessens the ability for scientific insight and/or research creativity,Other	It may produce meaningless data, if the process is not sophisticated enhough, or if preliminary data analysis is mistaken as final. We might see a lot of false publications coming out.	Significantly increase	Yes	No	Reactive,Corrosive,Flammable,Pyrophoric,Radioactive,Toxicity,Carcinogen,Physical: sharps,Physical: heavy items,Other	high pressure, high voltage	Somewhat	Neither increase nor decrease	Some effort (e.g., minor lab renovation)	General lab tasks (e.g., part of day-to-day work but not necessarily workflow),Research planning (e.g., literature review, methodology research, hypothesis development) ,Experimental planning and design (e.g., any preparatory steps, supplies and materials planning and acquisition) ,Experimental set-up (e.g., preparing solutions, setting up equipment, organizing fume hood),Materials characterizati…		Experimental planning and design (e.g., any preparatory steps, supplies and materials planning and acquisition) ,Experimental set-up (e.g., preparing solutions, setting up equipment, organizing fume hood),Data analysis, interpretation, and management (e.g., downloading raw data from instrumentation, cleaning and collating data, converting data from signal intensity into units that can be interpre…
88	Graduate student	Mostly experimental		University or academic research institution	I'm really interested in the possibilities generated using automation in the lab	40	6	Automating one of your lab tasks	Time spent on set-up tasks, clean-up tasks, or troubleshooting	50	30	20	4	6	5	1	2	3	7		1	To do things that are completely impossible for a human to currently do (e.g., imagine you had four arms).		Wafer/Sample cleaning prior to on-chip device fabrication.	Sample prep	Yes, wafer-prep would be the single biggest time saver.	yes	Cryogenic work using wet liquid helium systems.	Other	3	E-Beam Lithography of actual devices.	Other	Somewhat		Somewhat positive	It would be technically challenging to implement and maintain effective automated processes		Somewhat increase	Yes	No	Flammable,Toxicity,Physical: sharps		A little	Somewhat increase	Some effort (e.g., minor lab renovation)	General lab tasks (e.g., part of day-to-day work but not necessarily workflow),Research planning (e.g., literature review, methodology research, hypothesis development) ,Experimental planning and design (e.g., any preparatory steps, supplies and materials planning and acquisition) ,Experimental set-up (e.g., preparing solutions, setting up equipment, organizing fume hood),Materials synthesis (e.g…		Experimental set-up (e.g., preparing solutions, setting up equipment, organizing fume hood),Materials processing (e.g., treatment of materials into necessary form such as a film or powder),Device assembly (e.g., assembly or construction of a battery, probe, film or other device)
89	Non-PI scientist	Mostly experimental		National or international government-funded laboratory	I'm really interested in the possibilities generated using automation in the lab,I don’t have much experience with automation in the lab	10	30	Automating one of your data analysis steps	Getting access to the equipment you need (e.g., bench space, instrument time)	20	60	20	3	5	1	4	2	6	7		1	To get rid of dull, dirty, or dangerous lab tasks.	A lot of it is script-able, robust, data reduction an synthesis. How can I take data from multiple sources, synchronize them, correlate them, and generate results.	Working with a lot of new, custom equipment. We spend so much time doing troubleshooting we really limit our time to actually experiment with working equipment.	Integration	Troubleshooting is hard to automate, since every time it is a new problem. But a lot of our new equipment lacks automation interfaces, which is makes it very time consuming to actually conduct the experiments, as everything needs to be done manually.	no	Again, troubleshooting and getting equipment to work properly. Though better tools for automatically generating, maintaining, and updating user manuals would help a lot.	Experiment setup	2	We have a lot dangerous procedures we conduct. We need to be very careful when automating them such that if anything goes wrong, the test stops safely right away.	Hazardous experiments	A little		Somewhat positive	It would be technically challenging to implement and maintain effective automated processes		Somewhat increase	No (submit your responses and end the survey)
90	Postdoctoral researcher	Mostly computational/theoretical		Private sector	I'm really interested in the possibilities generated using automation in the lab,I don’t have much experience with automation in the lab								1	2	6	4	5	3	7		3	To do things that are completely impossible for a human to currently do (e.g., imagine you had four arms).												A lot	Positive	I have no negative feelings		Significantly increase	Yes	Yes
91	PI	Mostly computational/theoretical		National or international government-funded laboratory	I consider myself an expert in automation in the lab								3	5	4	1	2	6	7		1	To do things that are completely impossible for a human to currently do (e.g., imagine you had four arms).												Completely	Positive	It would be technically challenging to implement and maintain effective automated processes		Somewhat increase	No (submit your responses and end the survey)
92	PI	Mix of computational/theoretical and experimental		National or international government-funded laboratory	I consider myself an expert in automation in the lab,I'm really interested in the possibilities generated using automation in the lab	2	38	Automating one of your data analysis steps	Getting access to the equipment you need (e.g., bench space, instrument time)	0	0	0	4	5	6	1	3	2	7		3	To do things that are completely impossible for a human to currently do (e.g., imagine you had four arms).		N/A		I wouldn't pursue that: interested only in achieving autonomy of entire workflow.		I don't have any such reservations.	Nothing	10	Hypothesis generation, I suppose. At least for the moment.	Objectives / hypotheses	Completely		Positive	I have no negative feelings		Significantly increase	No (submit your responses and end the survey)
93	PI	Mostly computational/theoretical		University or academic research institution	I don’t have much experience with automation in the lab								5	6	4	1	2	3	7		3	To get rid of dull, dirty, or dangerous lab tasks.	predict molecule with property -&gt; make it											Completely	Positive	I have no negative feelings		Neither increase nor decrease	No (submit your responses and end the survey)
94	Graduate student	Mostly computational/theoretical		National or international government-funded laboratory	I'm really interested in the possibilities generated using automation in the lab								4	5	6	3	2	1	7		2	To do things that are completely impossible for a human to currently do (e.g., imagine you had four arms).												Somewhat	Positive	I have no negative feelings		Somewhat increase	Yes	Yes
95	PI	Mix of computational/theoretical and experimental		University or academic research institution	I'm really interested in the possibilities generated using automation in the lab	2	39	Automating one of your lab tasks	Getting access to the equipment you need (e.g., bench space, instrument time)	75	30	33	1	6	5	4	2	3	7		2	To do things that are completely impossible for a human to currently do (e.g., imagine you had four arms).		reproducible coin cells for electrochemistry	Cell assembly	yes	yes	none	Nothing	4	none	Nothing	A lot		Somewhat positive	Other	cost	Somewhat increase	No (submit your responses and end the survey)
96	Other	Other		National or international government-funded laboratory	I'm really interested in the possibilities generated using automation in the lab								3	5	4	1	6	2	7		2	To do things that are completely impossible for a human to currently do (e.g., imagine you had four arms).	React in timeframes that humans cannot											A lot	Somewhat positive	It would be technically challenging to implement and maintain effective automated processes		Somewhat increase	No (submit your responses and end the survey)
97	Other	Other		Private sector	I'm really interested in the possibilities generated using automation in the lab								2	5	6	1	3	4	7	Accelerated R&D and discovery	2	To do things that are completely impossible for a human to currently do (e.g., imagine you had four arms).												A lot	Positive	I have no negative feelings		Significantly increase	No (submit your responses and end the survey)
98	Non-PI scientist	Mostly experimental		National or international government-funded laboratory	I consider myself an expert in automation in the lab	35	5	Automating one of your data analysis steps	Time spent on set-up tasks, clean-up tasks, or troubleshooting	10	25	65	4	6	3	2	1	5	7		2	To do things that are completely impossible for a human to currently do (e.g., imagine you had four arms).	Collecting numerous, time-sensitive, multimodal diagnostic and characterizations during experiments.	Preparing and providing substrates and cleaning chamber windows currently pause autonomous workflow in PVD synthesis.	Sample prep	No. My rate limiting step is a somewhat simple task for a human but extremely difficult to auotmate. The automation of the actual experiment and data collection is the most important for reproducibility and data consistency.	no	Determining what metric of success to target in AI algorithms and how to measure it reliably with low error.	Objectives / hypotheses / design	10	Writing the paper. Determining the narrative and interpreting the results are the most important part.	Data interpretation	A lot		Somewhat positive	It would be technically challenging to implement and maintain effective automated processes		Somewhat increase	Yes	No	Other	Lasers	Somewhat	Neither increase nor decrease	Some effort (e.g., minor lab renovation)	General lab tasks (e.g., part of day-to-day work but not necessarily workflow),Research planning (e.g., literature review, methodology research, hypothesis development) ,Materials synthesis (e.g., collecting and manipulating samples in glove box, performing chemical reactions, heating, cooling, stirring, furnace combustion),Materials characterization (e.g., sample preparation, NMR, XRD, chromatog…		Research planning (e.g., literature review, methodology research, hypothesis development) ,Data analysis, interpretation, and management (e.g., downloading raw data from instrumentation, cleaning and collating data, converting data from signal intensity into units that can be interpreted by the researcher, running statistical analysis, analyzing spectra)
99	Postdoctoral researcher	Mostly experimental		National or international government-funded laboratory	I'm really interested in the possibilities generated using automation in the lab	25	20	Automating one of your lab tasks	Time spent on set-up tasks, clean-up tasks, or troubleshooting	50	30	20	1	4	2	5	3	6	7		2	To get rid of dull, dirty, or dangerous lab tasks.	I use a magnetron sputtering system to create combinatorial thin films of metal alloys. The majority of my time is spent troubleshooting and preparing the system for use. Preparation and maintenance can be dirty. Troubleshooting is extremely dull and even when the problem is 'fixed' I sometimes do not know either what caused the problem in the first place or why the problem went away.	Access to instruments needed for characterizing my sample. I am making thin film combinatorial libraries and I need to characterize the composition after making a sample to ensure that I got the right composition. I use an electron probe microanalyzer (EPMA) with wavelength dispersive spectroscopy (WDS) and electron dispersive spectroscopy (EDS) to characterize the composition. The EPMA probe is …	Other	No -- the rate limiting step is mostly about getting time on the instrument. The instrument itself is a fairly modern (ca 2016) commercial instrument made by JEOL. It is pretty automated and can do high throughput measurements.	no	Maintenance and troubleshooting of instruments takes up a considerable amount of time. It would be very difficult to build a robotic system that could do things like clean the sputtering chamber, change out sample targets, etc. You would be better off building a new sputtering system from scratch with automation in mind.	Experiment setup	6	Anything that has a high probability of causing a safety incident or dangerous conditions in the laboratory I would not want automated in the short term. If the failure of the robot or the automation system caused unsafe conditions in the laboratory it would be very bad. And my administrators would be VERY upset.	Hazardous experiments	A lot		Somewhat positive	It would be technically challenging to implement and maintain effective automated processes,Other	I am worried about the integration of data across automated system. If I change my data stream, or my data types, or I change the robotic automation on a instrument, am I going to have to re-build all of my workflows? I am worried about the flexibility of a 'fully automated' laboratory.	Significantly increase	No (submit your responses and end the survey)
100	PI	Mix of computational/theoretical and experimental		National or international government-funded laboratory	I consider myself an expert in automation in the lab	13	34	Automating one of your lab tasks	Time spent on set-up tasks, clean-up tasks, or troubleshooting	32	28	49	3	4	5	6	2	1	7		1	To do things that are completely impossible for a human to currently do (e.g., imagine you had four arms).		Moving samples between tools.	Experiment setup	Yes. Full automation is required.	yes	High-level scientific brainstorming and planning.	Objectives / hypotheses / design	10	Only intellectual tasks should not be automated.	Objectives / hypotheses	A lot		Positive	It would be technically challenging to implement and maintain effective automated processes		Significantly increase	Yes	No	Flammable,Carcinogen,Physical: sharps,Physical: heavy items		A lot	Significantly increase	A lot of effort (e.g., major lab renovation or entirely new space needed)	General lab tasks (e.g., part of day-to-day work but not necessarily workflow),Research planning (e.g., literature review, methodology research, hypothesis development) ,Experimental planning and design (e.g., any preparatory steps, supplies and materials planning and acquisition) ,Experimental set-up (e.g., preparing solutions, setting up equipment, organizing fume hood),Materials characterizati…		Experimental set-up (e.g., preparing solutions, setting up equipment, organizing fume hood),Data analysis, interpretation, and management (e.g., downloading raw data from instrumentation, cleaning and collating data, converting data from signal intensity into units that can be interpreted by the researcher, running statistical analysis, analyzing spectra),Data management (e.g., downloading raw da…
101	PI	Mostly experimental		National or international government-funded laboratory	I consider myself an expert in automation in the lab	0	36	Automating one of your lab tasks	Time spent on set-up tasks, clean-up tasks, or troubleshooting	31	63	29	1	2	4	3	5	6	7		2	To do things that are completely impossible for a human to currently do (e.g., imagine you had four arms).	Ability to execute numerous, complex experimental steps consistently	Automation of manual experimental processes and software/hardware integration	Integration	Yes	yes	Construction of research campaigns, goals and metrics	Objectives / hypotheses / design	10	Construction of overall research campaigns, oversight of safety and ethics	Objectives / hypotheses	Completely		Positive	Other	Concern over ethics	Significantly increase	Yes	No	Reactive,Corrosive,Flammable,Toxicity,Physical: sharps		A lot	Somewhat increase	Little effort (e.g., minimum renovation and equipment movement)	General lab tasks (e.g., part of day-to-day work but not necessarily workflow),Research planning (e.g., literature review, methodology research, hypothesis development) ,Experimental planning and design (e.g., any preparatory steps, supplies and materials planning and acquisition) ,Experimental set-up (e.g., preparing solutions, setting up equipment, organizing fume hood),Materials synthesis (e.g…		Experimental set-up (e.g., preparing solutions, setting up equipment, organizing fume hood),Materials synthesis (e.g., collecting and manipulating samples in glove box, performing chemical reactions, heating, cooling, stirring, furnace combustion),Data analysis, interpretation, and management (e.g., downloading raw data from instrumentation, cleaning and collating data, converting data from signa…
102	PI	Mix of computational/theoretical and experimental		University or academic research institution	I'm really interested in the possibilities generated using automation in the lab	2	40	Automating one of your lab tasks	Getting access to the equipment you need (e.g., bench space, instrument time)	51	33	21	2	5	3	4	6	1	7		2	To do things that are completely impossible for a human to currently do (e.g., imagine you had four arms).		x		x		x		6	x		Completely		Neutral	I have no negative feelings		Somewhat increase	No (submit your responses and end the survey)
103	PI	Mostly computational/theoretical		University or academic research institution	I don’t have much experience with automation in the lab								1	3	5	6	4	2	7		2	To do things that are completely impossible for a human to currently do (e.g., imagine you had four arms).												Somewhat	Neutral	It would be technically challenging to implement and maintain effective automated processes,Other	Automation removes flexibility. Also, it takes a lot of work, and it breaks.	Neither increase nor decrease	No (submit your responses and end the survey)
104	Other	Mostly experimental		National or international government-funded laboratory	I'm really interested in the possibilities generated using automation in the lab	0	40	Automating one of your lab tasks	Time spent on set-up tasks, clean-up tasks, or troubleshooting	39	25	35	3	6	5	1	4	2	7		3	To do things that are completely impossible for a human to currently do (e.g., imagine you had four arms).	I actually am more excited about autonomy (truly removing the human from the loop), but automation is a step to that. I think autonomy in many areas--materials, catalysis, biology--could truly allow us to learn and do things that we are unable to now. As a note, in the above answers, I commented on my groups activities since I don't spend time in the lab any longer.	synthesis of catalysis materials	Synthesis	yes.	yes	two things: synthesis and catalysis	Synthesis	10	nothing	Nothing	A lot		Positive	I have no negative feelings		Somewhat increase	No (submit your responses and end the survey)
105	PI	Mostly experimental		National or international government-funded laboratory	I'm really interested in the possibilities generated using automation in the lab	20	20	Automating one of your data analysis steps	Time spent on set-up tasks, clean-up tasks, or troubleshooting	10	10	80	1	2	4	5	3	6	7		1	To get rid of dull, dirty, or dangerous lab tasks.	Crystal alignment	Sample alignment and getting data into a decent format for various analysis programs	Experiment setup	Automating our sample alignment would be difficult due to the number of degrees of freedom and that the environment is hazardous to humans. It might be possible to do more with purchased equipment.	no	Writing up the results is hard to see being automated at this stage.	Data interpretation	4	I wouldn't want to automate the checking of physical reasonableness of my models after fitting--and that's a trust/QX issue.	Validation	A lot		Positive	It would be technically challenging to implement and maintain effective automated processes		Significantly increase	Yes	No	Radioactive		A little	Neither increase nor decrease	No effort (automation can be installed without reconfiguration)	General lab tasks (e.g., part of day-to-day work but not necessarily workflow),Research planning (e.g., literature review, methodology research, hypothesis development) ,Experimental planning and design (e.g., any preparatory steps, supplies and materials planning and acquisition) ,Experimental set-up (e.g., preparing solutions, setting up equipment, organizing fume hood),Materials characterizati…		Data analysis, interpretation, and management (e.g., downloading raw data from instrumentation, cleaning and collating data, converting data from signal intensity into units that can be interpreted by the researcher, running statistical analysis, analyzing spectra)
106	Other	Mostly experimental		National or international government-funded laboratory	I'm really interested in the possibilities generated using automation in the lab	10	40	Automating one of your lab tasks	Time spent on set-up tasks, clean-up tasks, or troubleshooting	50	20	30	1	2	6	3	5	4	7		1	To get rid of dull, dirty, or dangerous lab tasks.	The drudgery of preparing samples for solid-state NMR.	Instrument setup and troubleshooting	Experiment setup	It is not the rate limiting step, but it is a drudgery to prepare samples. It is tedious, time consuming, and simply awful to do.	no	The rate limiting step is either the experiment itself or the experiment setup, neither of which can be temporally modified or automated due to extensive expertise needed.	Experiment setup	1	Experiment setup - this must be done by someone with extensive domain knowledge, and even then I don't trust anyone else to do this for me.	On-the-fly	A little		Somewhat positive	It would be technically challenging to implement and maintain effective automated processes,I wouldn’t trust an automated process to do the job effectively		Somewhat increase	Yes	No	Flammable,Carcinogen,Physical: sharps,Physical: heavy items,Other	magnetic fields	A little	Neither increase nor decrease	A lot of effort (e.g., major lab renovation or entirely new space needed)	General lab tasks (e.g., part of day-to-day work but not necessarily workflow),Research planning (e.g., literature review, methodology research, hypothesis development) ,Experimental planning and design (e.g., any preparatory steps, supplies and materials planning and acquisition) ,Experimental set-up (e.g., preparing solutions, setting up equipment, organizing fume hood),Materials characterizati…		Experimental set-up (e.g., preparing solutions, setting up equipment, organizing fume hood),Materials characterization (e.g., sample preparation, NMR, XRD, chromatography, spectroscopy, mass spectrometry, etc.),Data analysis, interpretation, and management (e.g., downloading raw data from instrumentation, cleaning and collating data, converting data from signal intensity into units that can be in…
107	Other	Other		National or international government-funded laboratory	I'm really interested in the possibilities generated using automation in the lab,I don’t have much experience with automation in the lab								1	2	3	6	4	5	7		2	To get rid of dull, dirty, or dangerous lab tasks.	In case the experiment involves dangerous chemicals or radiation or electrical hazard, or other dangerous conditions											A lot	Somewhat positive	I have no negative feelings,Automation lessens the ability for scientific insight and/or research creativity		Somewhat increase	Yes	No	Radioactive,Physical: sharps,Physical: heavy items		A little	Somewhat increase	A lot of effort (e.g., major lab renovation or entirely new space needed)	General lab tasks (e.g., part of day-to-day work but not necessarily workflow),Research planning (e.g., literature review, methodology research, hypothesis development) ,Experimental planning and design (e.g., any preparatory steps, supplies and materials planning and acquisition) ,Experimental set-up (e.g., preparing solutions, setting up equipment, organizing fume hood),Materials property measu…		General lab tasks (e.g., part of day-to-day work but not necessarily workflow),Research planning (e.g., literature review, methodology research, hypothesis development) ,Experimental planning and design (e.g., any preparatory steps, supplies and materials planning and acquisition)
108	PI	Mix of computational/theoretical and experimental		University or academic research institution	I'm really interested in the possibilities generated using automation in the lab	10	38	Automating one of your data analysis steps	Time spent on set-up tasks, clean-up tasks, or troubleshooting	19	54	35	4	5	6	2	3	1	7		2	To do things that are completely impossible for a human to currently do (e.g., imagine you had four arms).
109	Graduate student
110	Graduate student
111	PI
112	Other	Mix of computational/theoretical and experimental		Private sector	I don’t have much experience with automation in the lab
113	Non-PI scientist
114	Other
115	Postdoctoral researcher	Mostly experimental		University or academic research institution	I use automation (e.g., robotic arms or autosampler) that is already available in the lab	40	15	Automating one of your lab tasks	Time spent on set-up tasks, clean-up tasks, or troubleshooting	50	18	100	1	4	3	6	5	2	7		2	To do things that are completely impossible for a human to currently do (e.g., imagine you had four arms).	Enhancing work efficiency can be achieved by implementing measures such as operating 24/7. By freeing up your hands, you can allocate more time for researchers to engage in critical thinking tasks instead of repetitive operations.
116	Graduate student
117	Other	Other		Private sector
118	PI	Mix of computational/theoretical and experimental		University or academic research institution	I consider myself an expert in automation in the lab	5	40	Automating one of your lab tasks	Getting access to the equipment you need (e.g., bench space, instrument time)	51	30	10
119
120	Non-PI scientist	Mix of computational/theoretical and experimental		Private sector	I don’t have much experience with automation in the lab
121	Graduate student
122	Graduate student
123
124	PI	Mostly experimental		University or academic research institution	I'm really interested in the possibilities generated using automation in the lab
125	Graduate student	Mostly experimental		University or academic research institution	I use automation (e.g., robotic arms or autosampler) that is already available in the lab	40	0	Automating one of your lab tasks	Getting access to the equipment you need (e.g., bench space, instrument time)	10	20	70	2	6	1	3	4	5	7		2	To get rid of dull, dirty, or dangerous lab tasks.
126	Non-PI scientist
127	Other	Mix of computational/theoretical and experimental		Private sector	I'm really interested in the possibilities generated using automation in the lab
128	Non-PI scientist
129	Postdoctoral researcher	Mostly computational/theoretical		National or international government-funded laboratory	I'm really interested in the possibilities generated using automation in the lab								1	3	5	4	2	6	7		1	To get rid of dull, dirty, or dangerous lab tasks.
130	Graduate student	Mostly computational/theoretical		Other
131	Other	Mostly computational/theoretical		Private sector	I consider myself an expert in automation in the lab
132	Other	Mostly experimental		Private sector	I'm really interested in the possibilities generated using automation in the lab,I use automation (e.g., robotic arms or autosampler) that is already available in the lab	40	15	Automating one of your lab tasks	Time spent on set-up tasks, clean-up tasks, or troubleshooting	50	25	25	1	2	6	5	3	4	7		3	To get rid of dull, dirty, or dangerous lab tasks.
133	PI	Mix of computational/theoretical and experimental		University or academic research institution	I consider myself an expert in automation in the lab
134	Graduate student	Mostly experimental		University or academic research institution	I don’t have much experience with automation in the lab	10	15	Automating one of your lab tasks	Time spent on set-up tasks, clean-up tasks, or troubleshooting	20	35	15	2	5	6	1	3	4	7		2	To get rid of dull, dirty, or dangerous lab tasks.
135	Graduate student
136
137	Non-PI scientist
138	Graduate student	Mix of computational/theoretical and experimental		National or international government-funded laboratory	I consider myself an expert in automation in the lab
139	Undergraduate student	Mostly experimental		University or academic research institution	I use automation (e.g., robotic arms or autosampler) that is already available in the lab
140
141	Undergraduate student	Mostly experimental		University or academic research institution	I'm really interested in the possibilities generated using automation in the lab
142	Other	Mix of computational/theoretical and experimental		Private sector	I use automation (e.g., robotic arms or autosampler) that is already available in the lab	8	30	Automating one of your data analysis steps	Time spent on set-up tasks, clean-up tasks, or troubleshooting	40	20	40
143
144	Non-PI scientist
145
146	Undergraduate student
147
148
149
150
151	Other	Mostly experimental		University or academic research institution	I consider myself an expert in automation in the lab
152	Postdoctoral researcher	Mix of computational/theoretical and experimental		National or international government-funded laboratory	I consider myself an expert in automation in the lab	10	30	Automating one of your data analysis steps	Time spent on set-up tasks, clean-up tasks, or troubleshooting	20	20	60	1	7	4	6	3	5	2	Generation of self-consistent datasets	2	To get rid of dull, dirty, or dangerous lab tasks.
[truncated: 14 more columns]
